# Supplementary material for: Stat3 phosphorylation is required for embryonic stem cells ground state maintenance in 2i culture media
Source: PubMed Central journal article supplement (PMC5458203; doi:10.18632/oncotarget.16112), 2017-03-10
Supplement: oncotarget-08-31227-s001.pdf [file oncotarget-08-31227-s001.pdf]

## Stat3 phosphorylation is required for ES cells ground state maintenance in 2i culture media

### Supplementary Materials

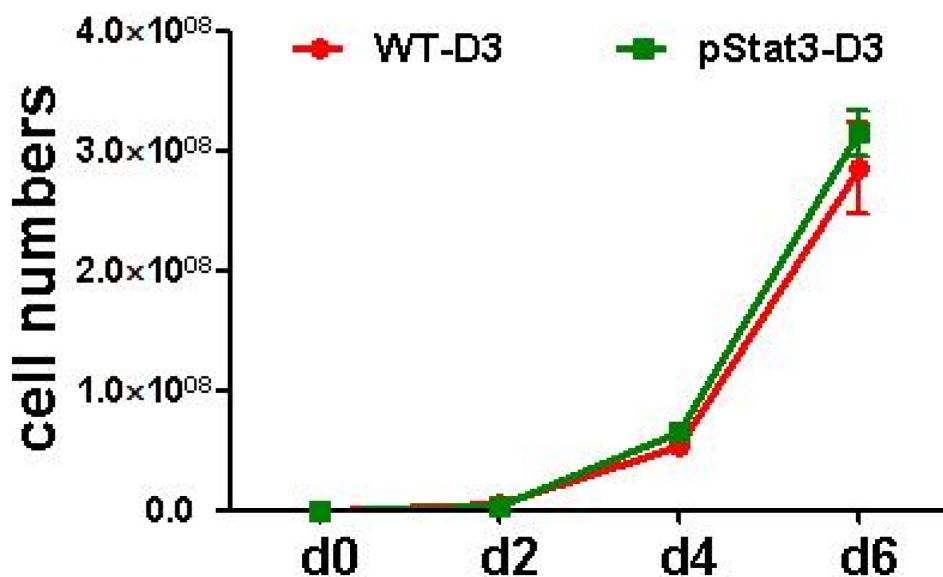

**Supplementary Figure 1: Cell proliferation assay between pStat3-D3 and control ES.** Growth curves showed no significant difference between wild-type D3 (wt-D3) ES cells and stably transduced ES cells (pStat3-D3) at various time points.

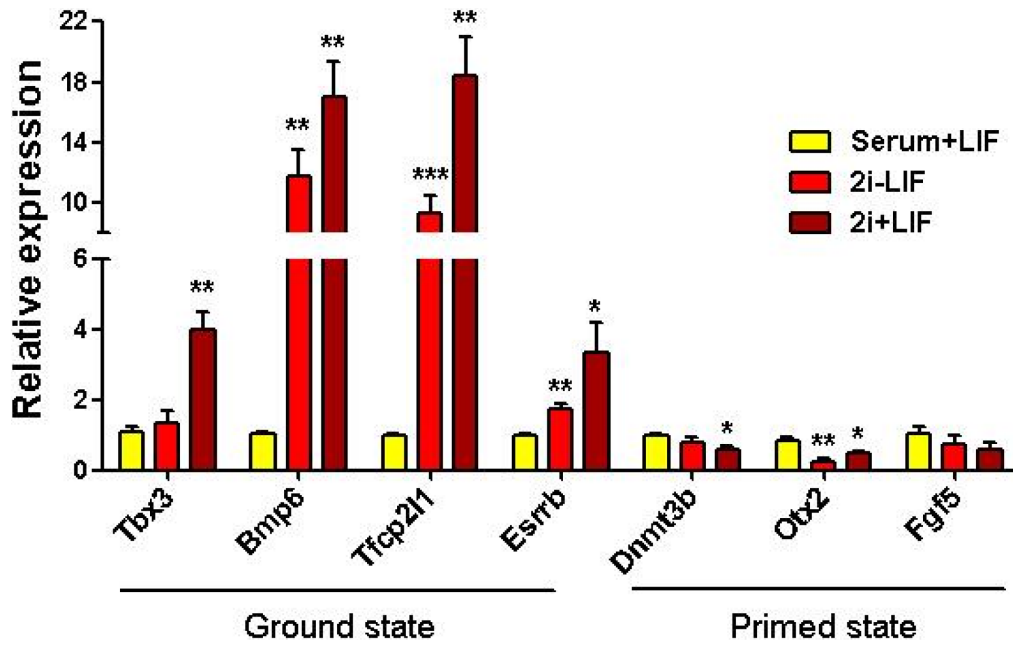

Supplementary Figure 2: Relative expression of ground state and primed state genes in serum+LIF, 2i-LIF and 2i+LIF. Real-time PCR showed the culture conditions of 2i-LIF and 2i+LIF could maintain the ground state of ES cells significantly. ( $n = 3$ ; \* $p < .05$ , \*\* $p < .01$ , \*\*\* $p < .001$ )

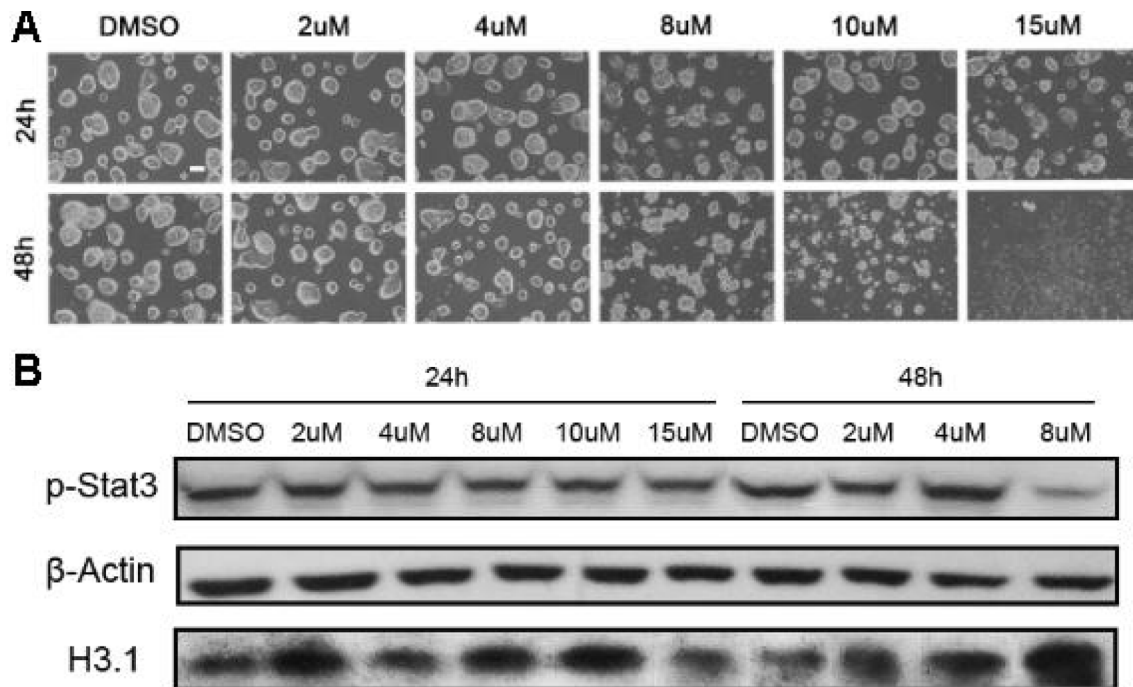

Supplementary Figure 3: pStat3-D3 ES cells with Stattic at different concentrations for 24 hours or 48 hours. (A) The cellular morphology of different concentrations and points with Stattic treatment. Scale bars: 100 μm. (B) Western blot with total Stat3 and p-Stat3 Y705 antibodies showed Stattic effectively repressed the phosphorylation of Stat3 at 8 μM for 48 hours.

**Supplementary Table 1: Primers for qPCR analysis**

| <b>Gene</b>    | <b>Forward primer</b>    | <b>Reverse primer</b>      |
|----------------|--------------------------|----------------------------|
| $\beta$ -Actin | GAGATTACTGCTCTGGCTCCTA   | GGACTCATCGTACTCCTGCTTG     |
| Tbx3           | GCAGTGGATGTCCAAAGTCGTCCT | CAGGTAGGTTTCGAAAAGTACTGTAA |
| Bmp7           | TACGTCAGCTTCCGAGACCT     | GGTGGCGTTCATGTAGGAGT       |
| Tfcp2l1        | AGGTGCTGACCTCCTGAAGA     | GTTTTGCTCCAGCTCCTGAC       |
| Esrrb          | CGCCACTCAAGAAGCCATTG     | CATGTATGGGCAAAGGGGGA       |
| Dnmt3b         | GCTATTTGTCTTGAGGCGCT     | GCTATTTGTCTTGAGGCGCT       |
| Otx2           | GGAGAGGACGACATTTACTAGG   | TTCTGACCTCCATTCTGCTG       |
| Fgf5           | TCTTCTGCAGCCACCTGATC     | AGTCTGTACTTCACTGGGCTGG     |
| Stat3          | GCCATCCTAAGCACAAAGCC     | GGGAATGTCGGGGTAGAGGT       |
| Socs3          | ATTCACCCAGGTGGCTACAG     | GCCAATGTCTTCCCAGTGTT       |
| Nanog          | GCTCCGCTCCATAACTTCG      | ACCTGGCTTTGCCCTGACT        |
